# Supplementary material for: Telomere Shortening and Psychiatric Disorders: A Systematic Review
Source: MDPI journal article supplement (doi:10.3390/cells10061423), 2021-06-07
Supplement: s1 [file s1]

**Table S1**

Quality assessment of case-control studies by the Newcastle-Ottawa Scale (NOS)

| <b>Authors</b>                    | <b>Selection</b> | <b>Comparability</b> | <b>Exposure</b> |
|-----------------------------------|------------------|----------------------|-----------------|
| <i>Tyrka et al.[18]</i>           | ☆☆               | ☆☆                   | ☆☆☆             |
| <i>Vincent et al.[25]</i>         | ☆☆☆☆             | ☆                    | ☆               |
| <i>Liu et al.[33]</i>             | ☆                | ☆                    | ☆☆              |
| <i>Wang X et al.[34]</i>          | ☆☆               | ☆☆                   | ☆☆              |
| <i>Wolkowitz et al.[36]</i>       | ☆☆☆              | ☆☆                   | ☆☆☆             |
| <i>Verhoeven et al.[38]</i>       | ☆☆☆              | ☆☆                   | ☆☆☆             |
| <i>Blom et al.[40]</i>            | ☆☆               | ☆☆                   | ☆☆              |
| <i>Wikgren et al.[44]</i>         | ☆☆☆              | ☆                    | ☆☆              |
| <i>Szebeni et al.[45]</i>         | ☆                | ☆☆                   | ☆               |
| <i>Boeck et al.[47]</i>           | ☆☆☆              | ☆☆                   | ☆☆              |
| <i>Jiménez et al.[48]</i>         | ☆☆               | ☆☆                   | ☆☆              |
| <i>Simon et al.[51]</i>           | ☆☆☆              | ☆☆                   | ☆☆              |
| <i>Harttman et al.[52]</i>        | ☆☆               | ☆☆                   | ☆☆              |
| <i>Karabatsiakakis et al.[53]</i> | ☆☆☆              | ☆☆                   | ☆☆              |
| <i>Mamdani et al.[56]</i>         | ☆                | ☆                    | ☆☆              |
| <i>Jergović et al.[64]</i>        | ☆☆☆              | ☆☆                   | ☆☆              |
| <i>Avetyan et al.[65]</i>         | ☆☆☆              | ☆                    | ☆☆☆             |
| <i>Verhoeven et al [68]</i>       | ☆☆☆☆             | ☆☆                   | ☆☆☆             |
| <i>Prelog et al.[70]</i>          | ☆☆               | ☆☆                   | ☆☆☆             |
