# Supplementary material for: Telomere Shortening and Psychiatric Disorders: A Systematic Review
Source: MDPI journal article supplement (doi:10.3390/cells10061423), 2021-06-07
Supplement: s1 [file s1]

**Table S2**

Quality assessment of cohort studies by the Newcastle-Ottawa Scale (NOS)

| <b>Author</b>               | <b>Selection</b> | <b>Comparability</b> | <b>Outcome</b> |
|-----------------------------|------------------|----------------------|----------------|
| <i>Hoen et al.[21]</i>      | ☆☆☆              | ☆☆                   | ☆☆             |
| <i>Hoen et al.[23]</i>      | ☆☆☆              | ☆☆                   | ☆☆             |
| <i>Verhoeven et al.[25]</i> | ☆☆☆☆             | ☆☆                   | ☆☆             |
| <i>Verhoeven et al.[26]</i> | ☆☆☆☆             | ☆☆                   | ☆☆             |
| <i>Vance et al.[41]</i>     | ☆☆☆☆             | ☆☆                   | ☆☆☆            |
| <i>Starnino et al.[42]</i>  | ☆☆☆              | ☆☆                   | ☆              |
| <i>Solomon et al.[54]</i>   | ☆☆               | ☆                    | ☆☆☆            |
| <i>Verhoeven et al.[55]</i> | ☆☆☆              | ☆                    | ☆☆☆            |
| <i>Malan et al.[60]</i>     | ☆☆☆              | ☆                    | ☆☆☆            |
