# Supplementary material for: Telomere Shortening and Psychiatric Disorders: A Systematic Review
Source: MDPI journal article supplement (doi:10.3390/cells10061423), 2021-06-07
Supplement: s1 [file s1]

**Table S3**

Quality assessment of cross-sectional studies by the adapted version of the Newcastle-Ottawa Scale (NOS)—see Appendixes

| Author                             | Selection | Comparability | Exposure |
|------------------------------------|-----------|---------------|----------|
| <i>Shaffer et al.[16]</i>          | ☆☆☆☆      | ☆☆            | ☆☆☆      |
| <i>Zhang et al.[57]</i>            | ☆☆        | ☆☆            | ☆☆       |
| <i>AlAhwal et al.[24]</i>          | ☆         | ☆☆            | ☆☆       |
| <i>Needham et al.[11]</i>          | ☆☆☆       | ☆☆            | ☆☆       |
| <i>Whisman et al.[27]</i>          | ☆☆☆☆      | ☆☆            | ☆☆       |
| <i>Lin et al.[28]</i>              | ☆☆        | ☆☆            | ☆☆☆      |
| <i>Zhao et al.[29]</i>             | ☆☆☆       | ☆☆            | ☆☆☆      |
| <i>Chae et al.[31]</i>             | ☆☆☆       | ☆☆            | ☆☆       |
| <i>Phillips et al.[32]</i>         | ☆☆☆       | ☆             | ☆☆       |
| <i>Schaakxs et al.[35]</i>         | ☆☆☆☆      | ☆☆            | ☆☆       |
| <i>Georgin-Lavialle et al.[37]</i> | ☆         | ☆             | ☆☆       |
| <i>Putermanet et al.[39]</i>       | ☆☆        | ☆             | ☆☆☆      |
| <i>Wang et al.[43]</i>             | ☆☆☆☆      | ☆☆            | ☆☆       |
| <i>Liu et al.[46]</i>              | ☆☆☆☆      | ☆☆            | ☆☆       |
| <i>Wium-Andersen et al.[49]</i>    | ☆☆☆☆      | ☆☆            | ☆☆☆      |
| <i>Huzen et al.[50]</i>            | ☆☆☆       | ☆             | ☆☆☆      |
| <i>Zhang et al.[67]</i>            | ☆☆☆       | ☆             | ☆☆       |
| <i>Bersani et al.[63]</i>          | ☆         | ☆☆            | ☆☆       |
| <i>O'Donovan et al.[58]</i>        | ☆         | ☆☆            | ☆☆       |
| <i>Kang et al.[59]</i>             | ☆☆        | ☆☆            | ☆☆       |
| <i>Boks et al.[61]</i>             | ☆☆        | ☆☆            | ☆☆       |
| <i>Roberts et al.[62]</i>          | ☆☆        | ☆☆            | ☆☆☆      |
| <i>Ladwig et al.[63]</i>           | ☆☆☆☆      | ☆☆            | ☆☆☆      |
| <i>Kim et al.[66]</i>              | ☆☆☆       | ☆☆            | ☆☆       |
| <i>Groer et al.[69]</i>            | ☆☆        | ☆☆            | ☆☆       |
